# Supplementary material for: Regionalization of Root Zone Moisture Estimations from Downscaled Surface Moisture and Environmental Data with the Soil Moisture Analytical Relationship Model
Source: MDPI journal article supplement (doi:10.3390/w15234133), 2023-11-29
Supplement: s1 [file s1]

## Supplementary Materials

### Title

Regionalization of Root Zone Moisture Estimations from Downscaled Surface Moisture and Environmental Data with the Soil Moisture Analytical Relationship Model

### Authors

Yonghao Liu <sup>1</sup>, Taohui Li <sup>1</sup>, Wenxiang Zhang <sup>1\*</sup> and Aifeng Lv <sup>2\*</sup>,

### Affiliations

1 Key Laboratory of Plateau Geographic Processes and Environment Change of Yunnan Province, Faculty of Geography, Yunnan Normal University, Kunming 650500, China; lyh201758@163.com (Y.L.); taohui0813@foxmail.com (T.L.)

2 Key Laboratory of Water Cycle and Related Land Surface Processes, Institute of Geographic Sciences and Natural Resources Research, CAS, Beijing 100101, China

\* Correspondence: wenxiangzhang@ynnu.edu.cn (W.Z.); lvaf@igsnrr.ac.cn (A.L.)

**Supplementary Table S1.** Elevation, land use, and texture information for the area studied

| Site | Elevation(m) | Land use type | Text*           |
|------|--------------|---------------|-----------------|
| L1   | 1433         | grassland     | Sandy loam      |
| L2   | 1401         | grassland     | Sandy clay      |
| L6   | 1369         | grassland     | Sandy clay loam |
| L8   | 1435         | grassland     | Sandy clay loam |
| L9   | 1443         | grassland     | Loamy sand      |
| L10  | 1410         | grassland     | Sandy clay      |
| L11  | 1280         | grassland     | Sandy clay loam |
| L12  | 1315         | grassland     | Loamy sand      |
| L13  | 1329         | grassland     | Loamy sand      |
| L14  | 1383         | grassland     | sandy clay      |
| M1   | 1343         | grassland     | Sandy clay loam |
| M3   | 1466         | farmland      | Sandy clay loam |
| M5   | 1433         | grassland     | Loamy sand      |
| M6   | 1308         | grassland     | Sandy loam      |
| M9   | 1280         | grassland     | Sandy clay loam |

|     |      |           |                 |
|-----|------|-----------|-----------------|
| M10 | 1327 | grassland | Sandy loam      |
| M11 | 1470 | grassland | sand            |
| S2  | 1363 | grassland | Loamy sand      |
| S3  | 1343 | grassland | Sandy loam      |
| S5  | 1327 | grassland | clay            |
| S7  | 1332 | grassland | Sandy clay loam |
| S8  | 1334 | grassland | clay            |

Note: \*Soil texture is classified according to USUD-NRCS.

[Supplementary Table S2](#). Parameters associated with soil texture type and SMAR modeling

| Soil Texture    | por   | Sc1  | Sw2  |
|-----------------|-------|------|------|
| Sand            | 0.437 | 0.14 | 0.06 |
| Loamy sand      | 0.437 | 0.24 | 0.11 |
| Sandy loam      | 0.453 | 0.42 | 0.19 |
| Silty loam      | 0.501 | 0.57 | 0.27 |
| Loam            | 0.463 | 0.5  | 0.25 |
| Sandy clay loam | 0.398 | 0.62 | 0.34 |
| Silty clay loam | 0.471 | 0.73 | 0.45 |
| Clay loam       | 0.464 | 0.67 | 0.4  |
| Sandy clay      | 0.43  | 0.75 | 0.51 |
| Silty clay      | 0.479 | 0.78 | 0.52 |
| Clay            | 0.475 | 0.8  | 0.56 |
